# Supplementary material for: Elemental analysis of lithium ion batteries
Source: Royal Society of Chemistry journal article supplement (doi:10.1039/c7ja00073a), 2017-01-01
Supplement: c7ja00073a1.pdf [file c7ja00073a1.pdf]

|                                                                |                |
|----------------------------------------------------------------|----------------|
| atomic absorption spectroscopy                                 | AAS            |
| battery-electric vehicle                                       | BEV            |
| cathode electrolyte interphase                                 | CEI            |
| charge-coupled device                                          | CCD            |
| dimethyl carbonate                                             | DEC            |
| dimethyl carbonate                                             | DMC            |
| electric vehicles                                              | EVs            |
| energy dispersive X-ray spectroscopy                           | EDX            |
| ethyl methyl carbonate                                         | EMC            |
| ethylene carbonate                                             | EC             |
| gas chromatography-mass spectrometry                           | GC-MS          |
| glow discharge optical emission spectroscopy                   | GD-OES         |
| graphite intercalations compounds                              | GIC            |
| highly oriented pyrolytic graphite                             | HOPG           |
| hybrid electric vehicles                                       | HEV            |
| inductively coupled plasma                                     | ICP            |
| inductively coupled plasma – mass spectrometry                 | ICP-MS         |
| inductively coupled plasma – optical emission spectrometry     | ICP-OES        |
| inductively coupled plasma-atomic absorption spectroscopy      | ICP-AAS        |
| ion chromatography                                             | IC             |
| laser ablation- inductively coupled plasma – mass spectrometry | LA-ICP-MS      |
| limit of detection                                             | LOD            |
| $\text{LiNi}_{0.33}\text{Co}_{0.33}\text{Mn}_{0.33}\text{O}_2$ | NMC            |
| lithium cobalt oxide                                           | LCO            |
| lithium metal oxide                                            | $\text{LMO}_2$ |
| microfocused X-ray absorption near-edge spectroscopy           | $\mu$ -XANES   |
| microfocused X-ray fluorescence                                | $\mu$ -XRF     |
| organic (fluoro)phosphates                                     | OPs            |
| plug-in hybrid                                                 | PEV            |
| propylene carbonate                                            | PC             |
| secondary ion mass spectrometry                                | SIMS           |
| soft X-ray absorption spectroscopy                             | XAS            |
| solid electrolyte interphase                                   | SEI            |
| solid-state detector                                           | SSD            |
| state of charge                                                | SOC            |
| state of health                                                | SOH            |
| total reflection X-ray fluorescence                            | TXRF           |
| transition metal dissolution                                   | TMD            |
| X-ray absorption near-edge structure                           | XANES          |
| X-ray diffraction                                              | XRD            |
| X-ray photoelectron spectroscopy                               | XPS            |
